# Supplementary material for: Dominance rank-associated gene expression is widespread, sex-specific, and a precursor to high social status in wild male baboons
Source: PubMed Central journal article supplement — Proc Natl Acad Sci U S A. 2018 Dec 11;115(52):E12163–71. doi: 10.1073/pnas.1811967115 (PMC6310778; doi:10.1073/pnas.1811967115), 2018-12-11
Supplement: pnas.1811967115.sapp.pdf [file pnas.1811967115.sapp.pdf]

1           Supplementary Information for Lea et al. “**Dominance rank-associated immune gene**  
2 **expression is widespread, sex-specific, and a precursor to high social status in wild male**  
3 **baboons**”  
4

5 Table of contents:  
6

7 1. Supplementary Materials and Methods  
8

9 2. Supplementary Figures

- 10     • Figure S1. *Ex vivo* stimulation with lipopolysaccharide (LPS) induces changes in the  
11 abundance of immune signaling molecules.
- 12     • Figure S2. Overview of cell phenotyping strategy.
- 13     • Figure S3. Association between dominance rank and the proportions of 5 white blood cell  
14 populations.
- 15     • Figure S4. Gene ontology (GO) term enrichment for genes that are significantly up-  
16 regulated or down-regulated in the LPS condition.
- 17     • Figure S5. Rank-gene expression relationships in males and females are largely distinct.
- 18     • Figure S6. Sample size does not completely explain the difference in the number of  
19 significant rank-associated genes detected in males versus females.
- 20     • Figure S7. Social status has weak effects on the strength of the response to LPS infection.
- 21     • Figure S8. High status males exhibit higher expression of pro-inflammatory genes  
22 compared to low status males, in both NULL and LPS condition samples.
- 23     • Figure S9. Genes up-regulated in low-ranking captive female macaques are up-regulated  
24 in high-ranking wild male baboons.
- 25     • Figure S10. Overview of filtering procedures for Mendelian randomization analyses.
- 26     • Figure S11. Overview of methods and results for single gene Mendelian randomization  
27 analyses.
- 28     • Figure S12. MR instruments are more likely to occur in genes and regulatory regions.  
29

30 3. Supplementary References  
31  
32  
33

## 34 **Supplementary Materials and Methods**

### 35 *Study subjects, sample collection, and sample processing*

36 All study subjects were members of a long-term study population of yellow baboons  
37 (*Papio cynocephalus*, with some admixture from a closely related species, the anubis baboon, *P.*  
38 *anubis* [1]) that has been monitored by the Amboseli Baboon Research Project (ABRP) since  
39 1971 [2]. Animals in the study population are individually recognized and observed on a near  
40 daily basis from birth onwards. Thus, the ages of individuals born in the study population were  
41 known to within a few days' error. For study subjects that immigrated into the study population  
42 as adults (n = 10 males in our data set), ages were estimated by trained observers based on  
43 morphological features and comparison to known-age animals [3]. Dominance hierarchies were  
44 constructed monthly for every social group in the study population based on the outcomes of  
45 dyadic aggressive encounters. Ordinal dominance ranks were assigned to every adult based on  
46 these hierarchies, such that low numbers signify high rank/social status and high numbers signify  
47 low rank/social status [4].

48 Blood samples were collected from each study subject (n = 61) in May through August of  
49 2012-2016 following well-established procedures [5–8]. Briefly, animals were immobilized by  
50 an anesthetic-bearing dart delivered through a hand-held blow gun, and, following  
51 immobilization, were quickly transferred to a processing site for blood sample collection. At the  
52 processing site, we collected two types of samples for each individual:

53 (i) 2 – 4 mL whole blood in a CPT vacutainer tube (Becton, Dickinson, and Company) to  
54 isolate peripheral blood mononuclear cells (PBMCs). CPT tubes were stored overnight at the  
55 field site and shipped the next day to the Institute of Primate Research (IPR) in Nairobi. At IPR,  
56 PBMCs were purified, antibody stained for cell surface markers that discriminate monocytes

57 (CD3<sup>-</sup>, CD20<sup>-</sup>, CD14<sup>+</sup>), Natural Killer cells (CD3<sup>-</sup>, CD20<sup>-</sup>, CD16<sup>+</sup>), B cells (CD3<sup>-</sup>, CD20<sup>+</sup>),  
58 helper T cells (CD3<sup>+</sup>, CD8<sup>-</sup>, CD4<sup>+</sup>), and cytotoxic T cells (CD3<sup>+</sup>, CD8<sup>+</sup>, CD4<sup>-</sup>), and profiled for  
59 PBMC composition using flow cytometry on a BD FACS Calibur machine. To distinguish T and B  
60 cells, we stained 0.5 million purified PBMCs with 3 ul anti-CD3-APC-Cy7 (clone SP34-2, BD  
61 Biosciences #557757), 5 ul anti-CD4-FITC (clone L200, BD Biosciences #550628), 1 ul anti-  
62 CD20-PE-Cy7 (clone L27, BD Biosciences #335793), and 5 ul anti-CD8-PE (clone 3B5,  
63 Invitrogen #MHCD0804). To distinguish Natural Killer and monocyte cells, we stained a second  
64 aliquot of 0.5 million purified PBMCs with 3 ul anti-CD3-APC-Cy7, 5 ul anti-CD16-PE (clone  
65 3G8, BD Biosciences #560995), and 5 ul anti-CD14-FITC (clone 322A-1 MY4, Beckman  
66 Coulter #6603262).

67 (ii) 1 mL of whole blood in each of two TruCulture tubes (Myriad RBM) to assess the  
68 cytokine and gene expression response to lipopolysaccharide (LPS). For each animal, blood was  
69 collected into one tube that contained cell culture media alone (the 'NULL' tube) and a second  
70 tube that contained culture media plus 0.1 ug/mL lipopolysaccharide (the 'LPS' tube). NULL  
71 and LPS tubes were then incubated in parallel at 37 °C for 10 hours. Following incubation, we  
72 collected serum for cytokine profiling, lysed the red blood cell fraction (PureGene Red Cell  
73 Lysis Buffer, QIAGEN), and collected white blood cells for gene expression profiling. Serum  
74 samples and RNAlater-preserved white blood cells (ThermoFisher Scientific) were stored at -20  
75 °C until transport to the United States.

76 Following sample collection, study subjects were allowed to regain consciousness in a  
77 covered holding cage until they were fully recovered from the effects of the anesthetic, and then  
78 released near their social group.

79

80 *Generation and processing of cytokine data*

81 For a subset of individuals (n=29; n=18 males and 11 females), we measured circulating  
82 levels of 23 cytokines involved in the immune response (Dataset S1). Specifically, we used  
83 serum isolated from both the LPS and NULL condition TruCulture tubes to perform cytokine  
84 profiling with the MILLIPLEX MAP Non-Human Primate Cytokine Magnetic Bead Panel  
85 (EMD Millipore) following the manufacturer's instructions. All samples were assayed in  
86 duplicate, and all cytokine work was performed by the Immunology Unit of the Duke University  
87 Regional Biocontainment Laboratory.

88 We excluded a given cytokine from downstream analyses if more than half of our  
89 samples did not exceed the lower limit of quantification for that cytokine. Further, we computed  
90 the correlation between normalized cytokine values for duplicate samples and excluded measures  
91 with  $R^2 < 0.8$  between replicates. We did not exclude any individual samples from analyses. For  
92 the remaining 15 cytokines that passed our filters, we tested for differences between LPS and  
93 NULL condition samples using linear mixed effects models implemented in the R package  
94 'nlme' [9]. Specifically, we modeled each set of normalized cytokine values as a function of  
95 condition (NULL or LPS), age of the donor, sex of the donor, and individual identity (as a  
96 random effect). We extracted the p-values associated with the condition effects and corrected for  
97 multiple hypothesis testing using an FDR approach [10,11] (Figure S1).

98

99 *Generation and low level processing of mRNA-seq data*

100 For each TruCulture sample, we extracted RNA from white blood cells stored in  
101 RNAlater (ThermoFisher Scientific) using the RNeasy mini kit (QIAGEN) following the  
102 manufacturers' instructions. RNA quality was assessed for a random subset of samples (n=36)

103 using an Agilent RNA 6000 Nano kit and an Agilent 2100 Bioanalyzer (mean  $\pm$  SD of RIN  
104 values =  $8.56 \pm 0.86$ ).

105 For each sample, we used 200 ng of total RNA as the input for mRNA isolation using the  
106 NEBNext Poly(A) mRNA Isolation Module (New England BioLabs). We generated mRNA-seq  
107 libraries for high-throughput sequencing from the isolated mRNA using the NEBNextUltra RNA  
108 Library Prep Kit for Illumina (New England BioLabs), following the manufacturers'  
109 instructions. We pooled 10-12 samples per lane of sequencing (100 bp paired-end) on an  
110 Illumina HiSeq 2500. We recovered a mean of  $18.03 \pm 9.94$  (SD) million reads per individual  
111 (Dataset S2).

112 Following sequencing, we trimmed Illumina adapter sequence and low quality bases from  
113 the ends of the reads using the default settings in Trimmomatic [12]. We mapped trimmed reads  
114 to the anubis baboon genome (*Panu 2.0*) using the STAR aligner and the recommended two-pass  
115 method [13]. For each gene, we collated the number of reads that overlapped any annotated exon  
116 using the program HTSeq [14] and NCBI's *Panu 2.0* RefSeq exon annotations [15]. In  
117 downstream analyses, we only included genes with mean RPKM values  $> 1$  in both the NULL or  
118 LPS condition. We retained 7576 genes after applying these filters. At this stage, we also  
119 removed the LPS condition sample from one individual who appeared not to respond to  
120 stimulation (RPKM value for the IL6 gene was  $< 1$  in the LPS condition). This filtering left us  
121 with  $n=121$  total samples, 61 from the NULL condition and 60 from the LPS condition.

122 Prior to analysis, we normalized the read count data using the function  
123 '*voomWithQualityWeights*' in the R package *limma* [16]. Further, we removed known batch  
124 effects (i.e., the year of sample collection) as well as effects of cell type composition using linear  
125 models implemented in *limma*. To do so, we first performed PCA on the relative abundance data

126 for each of 5 cell types described above, and used the loadings from the first two principal  
127 components (which together explained 84.44% of the total variance) as covariates in linear  
128 models (see Figure S3 for analyses of rank effects on cell type composition). Finally, to obtain  
129 the PCA projection shown in Figure 2, we computed the covariance matrix of normalized, batch-  
130 and cell type-corrected gene expression values for our set of filtered genes and used this matrix  
131 as the input for the ‘*prcomp*’ function in R.

132

### 133 *Genotyping*

134 We used genotype data to confirm that paired LPS and NULL samples were matched to  
135 the same individual, to estimate pairwise genetic relatedness, and to perform Mendelian  
136 randomization. To do so, we called variants across all regions within 200 kb of an annotated  
137 gene (i.e., within the gene body or within 200 kb of the transcription start or end site) using  
138 HaplotypeCaller from the Genome Analysis Toolkit (GATK v3.3.0). For all steps, we followed  
139 the Best Practices for variant calling using RNA-seq data  
140 (<https://www.broadinstitute.org/gatk/guide/article?id=3891>). After genotyping, we retained sites  
141 that passed the following filters: variant quality score  $\geq 100$ ; QD  $< 2.0$ ; MQ  $< 35.0$ ; FS  $> 60.0$ ;  
142 HaplotypeScore  $> 13.0$ ; MQRankSum  $< -12.5$ ; and ReadPosRankSum  $< -8.0$ . Additionally, we  
143 used the program vcftools [17] to remove variant calls with quality scores  $< 10$ , as well as sites  
144 that had a mean depth of coverage  $< 5x$  or that were not in Hardy-Weinberg equilibrium  
145 ( $p < 0.05$ ). This filtering left us with 99,760 SNPs. We imputed data for missing genotype values  
146 (10.93%) using default settings in Beagle [18].

147 To obtain our final call set, we averaged the filtered, imputed genotype calls from the  
148 LPS and NULL conditions for each individual at each locus (resulting in a numeric value

149 between 0 and 2 for each; note that for all individuals, genotype calls from the two conditions  
 150 were identical at >99% of genotyped sites). To estimate pairwise relatedness between  
 151 individuals, we used the ‘*relatedness2*’ option in *vcftools* [17,19].

152

### 153 *Testing for associations between rank and gene expression*

154 To identify genes for which gene expression was significantly predicted by dominance  
 155 rank, we used linear mixed effects models implemented in the R package ‘EMMREML’ [20].  
 156 Specifically, for each gene in our dataset, we ran the following model:

$$y_i = \mu + r_i \beta_{r1} * I(s_i = 0) + r_i \beta_{r2} * I(s_i = 1) + a_i \beta_{a1} * I(s_i = 0) + a_i \beta_{a2} * I(s_i = 1) + c_i \beta_c + g_i + e_i, \quad (1)$$

$$157 \quad g_i \sim MVN(0, \sigma_g^2 \mathbf{K}),$$

$$158 \quad e_i \sim MVN(0, \sigma_e^2 \mathbf{I})$$

159 where  $y_i$  is the gene expression level estimate for sample  $i$ ,  $\mu$  is the intercept,  $c_i$  is a binary  
 160 variable indicating whether sample  $i$  is from the control or LPS condition (1=control and  
 161 0=LPS), and  $\beta_c$  is the corresponding estimate of the condition effect.  $I$  is an indicator variable  
 162 for sex ( $s_i$ ; 0=female and 1=male).  $a_i$  and  $r_i$  represent the age and dominance rank, respectively,  
 163 of the focal individual at the time of sample collection.  $e_i$  is a random effects term to control for  
 164 environmental noise, and  $g_i$  is a random effects term to control for kinship and other sources of  
 165 genetic structure.  $\mathbf{K}$  is an  $n \times n$  matrix that contains estimates of pairwise genetic relatedness  
 166 derived from genotype data.  $\sigma_g^2$  and  $\sigma_e^2$  are the genetic and environmental variance components,  
 167 respectively.  $\mathbf{I}$  is the identity matrix, and MVN denotes the multivariate normal distribution. We  
 168 chose to use a mixed effects model of this type in order to exclude false positive associations  
 169 between dominance rank and gene expression that could emerge if ranks are more similar

170 between related individuals (as we know to be true in female baboons) and gene expression  
171 patterns are also more similar between related individuals (which is often the case for gene  
172 expression because gene expression levels are partially heritable in this and other populations:  
173 [5,21]). Mixed models that fit a random effect to account for genetic non-independence therefore  
174 test for associations between predictor and response variables of interest (here, dominance rank  
175 and gene expression), beyond that explained by genetic covariance between the study subjects  
176 [22,23].

177 We also tested for interactions between dominance rank and condition (NULL or LPS),  
178 as previous work has shown that rank effects on gene expression are more pronounced after LPS  
179 stimulation [24]. To do so, we ran the following model using data from males only (the sex  
180 where additive effects of dominance rank were common; n=70 samples from 31 individuals):

$$y_i = \mu + r_i\beta_r + a_i\beta_a + c_i\beta_c + (r_i * c_i)\beta_{rxc} + g_i + e_i \quad (2)$$

181 where  $(r_i * c_i)$  represents the interaction between dominance rank and condition, and  
182  $\beta_{rxc}$  is the effect size of the interaction term. All other terms are as described above.

183 As an alternative approach to testing for interactions, we tested for effects of male  
184 dominance rank on the magnitude of the gene expression response to LPS, using the fold change  
185 in gene expression levels between LPS and NULL conditions as the outcome variable.

186 Specifically, for each individual, we subtracted the *voom* normalized gene expression values  
187 estimated for the NULL sample from the normalized values for the LPS sample (*voom*  
188 normalized values are already  $\log_2$ -transformed, so subtraction in this case is equivalent to fold  
189 change). Using these values, we ran the following model where all predictor variables are as  
190 described above except  $y_i$ , which in equation 3 denotes the  $\log_2$  fold-change response to LPS:

$$y_i = \mu + r_i\beta_r + a_i\beta_a + g_i + e_i \quad (3)$$



191 For each gene, we extracted the p-value associated with the rank effect (nested within sex  
192 from equation 1, or without nesting from equation 3, for males only) or the rank interaction with  
193 condition (from equation 2). We corrected these distributions for multiple hypothesis testing  
194 using an FDR approach, and considered genes to be rank-associated if they passed a 5% FDR  
195 [10,11]. As described in the main text, we identified few rank x condition interactions or effects  
196 of rank on fold-change gene expression. Rather, genes that were more highly expressed in high-  
197 ranking (low-ranking) individuals at baseline tended to remain so after LPS stimulation,  
198 including those in innate immune defense and inflammation-related pathways (see also Figure  
199 S8).

200

#### 201 *Annotation of rank-associated genes*

202 We performed Gene Ontology (GO) enrichment analyses using the Cytoscape module  
203 ClueGO [25], using one-sided Fisher's Exact Tests and a Benjamini-Hochberg FDR approach to  
204 correct for multiple hypothesis testing [26]. To reduce our multiple testing burden and to account  
205 for the nested nature of GO terms, we focused our analyses on terms that: (i) were within levels  
206 3-8 of the Biological Process GO set; (ii) included at least 10 expressed genes from our data set;  
207 and (iii) included > 5% of all genes in the GO term in the test gene set. We report significant  
208 terms as those that were enriched in the test gene set at a 5% FDR (full results are provided in  
209 Dataset S4-5).

210 To investigate rank-related polarization of the TLR4 signaling pathway, we used  
211 previously compiled lists of genes associated with a MyD88- or TRIF-dependent response  
212 (obtained from antigen stimulation experiments in MyD88 or TRIF knock-out mice [27]).  
213 234/542 of the MyD88-dependent genes and 165/400 of the TRIF-dependent genes identified by

214 [27] had expressed orthologs in our dataset. Using these gene sets, we performed two analyses.  
215 First, we asked whether the distribution of dominance rank effect sizes differed between MyD88-  
216 versus TRIF-induced genes (Mann-Whitney U test). To do so, we focused on those genes that  
217 were significantly associated with rank in males and also upregulated in response to LPS.  
218 Second, we asked whether male social status predicted composite expression variation across all  
219 genes in the MyD88 or TRIF-dependent sets. To do so, we extracted, for each individual, the  
220 median normalized, batch- and cell type composition-corrected gene expression level for all  
221 genes measured in the LPS condition that were dependent on MyD88 or TRIF for antigen-  
222 stimulated up-regulation. Using these median values, we used Spearman's rank correlations to  
223 ask whether dominance rank predicted median gene expression levels for the set of MyD88  
224 versus TRIF-induced genes.

225

#### 226 *Comparison of rank-associated genes in female macaques and male baboons*

227 Previous work [24] reported strong, causal effects of dominance rank on gene expression  
228 in captive rhesus macaques. Specifically, Snyder-Mackler et al. manipulated female social status  
229 (n=45) and profiled gene expression in sorted cell populations, as well as in leukocytes at  
230 baseline and following immune stimulation with LPS. They found that genes associated with  
231 innate immune function and a pro-inflammatory phenotype were upregulated in low-ranking  
232 animals, who also mounted a stronger response to LPS. To compare our results with theirs, we  
233 compared our estimates of standardized rank effects in males ( $\beta_{r_2}$ ) to female macaque  
234 standardized rank effect estimates from leukocytes unexposed or exposed to LPS (Table S13  
235 from [24]). In the macaque study, social status was measured using Elo scores, such that higher  
236 numbers indicated higher social status; in our study, social status was measured using ordinal

237 ranks, such that higher numbers indicated lower social status. Therefore, for visualization (Figure  
238 3 and Figure S9), we polarized effect sizes from both studies so that a negative beta was  
239 equivalent to higher expression of a given gene in high status individuals. We used Spearman's  
240 rank correlations to estimate the consistency of effect size estimates between datasets, and a  
241 binomial test to understand whether effect size estimates were directionally consistent more often  
242 than expected by chance.

243

#### 244 *Behavioral mediation analyses*

245 To ask whether behaviors associated with high or low social status in males mediate the  
246 relationship between dominance rank and gene expression, we first created an index of received  
247 and initiated harassment for each individual. To do so, we extracted observations of dyadic  
248 agonistic encounters from the Amboseli Baboon Research Project's long-term database, BABASE.  
249 Data on these encounters are collected in the context of random-order focal sampling [28], where  
250 observers move through the group to locate and follow known individuals according to a  
251 predetermined list. Hence, records of agonisms are sampled in an unbiased, representative  
252 manner.

253 We summed the number of initiated or received agonisms involving each individual for  
254 the six month period prior to sample collection, and corrected this value for observer effort [29].  
255 Specifically, we regressed the sum of initiated agonisms or sum of received agonisms  
256 (separately) against a measure of observer intensity, calculated as the number of focal animal  
257 samples performed on adult females in a given social group and month, divided by the total  
258 number of adult females in the group (following [29]; focal samples are concentrated periods of  
259 observation focused on a single individual and collected in randomized order for target animals

260 in each social group [28]). Observer intensity estimates were calculated separately for each of the  
261 6 months spanning the period prior to sample collection, and then averaged to obtain a single  
262 value for linear regression. Finally, we extracted the residuals from the linear regression of  
263 initiated or received agonisms on observer effort and used these values in downstream analyses.

264         Next, we asked whether our indices of initiated or received harassment could explain the  
265 observed rank-gene expression associations, focusing specifically on genes for which this  
266 relationship was significant in males. For each gene, we were interested in estimating the indirect  
267 effect of male dominance rank on gene expression levels through the mediating variable  
268 (initiated or received agonisms). The strength of the indirect effect was estimated as the  
269 difference between the effect of rank in two models: the ‘unadjusted’ model that did not account  
270 for the mediator, and the effect of rank in an ‘adjusted’ model that incorporated the mediator,  $m_i$ .  
271 The unadjusted model, including only data from males, was as follows:

$$y_i = \mu + r_i\beta_r + a_i\beta_a + c_i\beta_c + g_i + e_i \quad (3)$$

272 Notations are consistent with equations 1 and 2. The adjusted model was:

$$y_i = \mu + r_i\beta_r + a_i\beta_a + c_i\beta_c + m_i\beta_m + g_i + e_i \quad (4)$$

273 where  $m_i$  was observer effort-corrected rates of initiated or received agonisms, respectively. To  
274 assess the significance of each indirect effect, we performed 1000 iterations of bootstrap  
275 resampling to calculate 95% confidence intervals for each mediator. We considered an indirect  
276 effect to be significant if (i) the lower bound of the 95% confidence interval did not overlap with  
277 0 and (ii) the absolute effect size of the rank effect decreased when the mediating variable was  
278 included in the model.

279

280 *Mendelian randomization analysis: selection of intermediate phenotype and instrumental*  
281 *variables*

282 Mendelian randomization (MR) is a form of instrumental variable analysis that uses a  
283 genetic variant (the instrument) to test whether an intermediate phenotype (in our case, PC2 of  
284 gene expression variation) is causal to a hypothesized outcome (in our case, dominance rank)  
285 [30]. Intuitively, MR can be thought of as analogous to a randomized controlled trial, where  
286 study participants are randomly allocated to a treatment or control group. This design avoids  
287 confounding between the treatment and outcome of interest, such that causal inference is  
288 unambiguous. In MR, genotypes are assumed to be randomly distributed with respect to potential  
289 confounding variables, and also are assumed to “randomize” each study subject into higher or  
290 lower values of the intermediate phenotype under genetic control. MR has been widely used in  
291 biomedical analyses [31], for example to test for a causal relationship between HDL cholesterol  
292 and myocardial infarction [32]. More recently, genetic effects on molecular phenotypes (e.g.,  
293 expression or methylation quantitative trait loci) have also been leveraged in an MR framework  
294 [33], for example to test the causal relationship between DNA methylation levels and traits  
295 related to cardiovascular disease [34].

296 Valid MR instruments must meet three criteria:

297 First, they must be robustly associated with the intermediate phenotype. In our analysis,  
298 we used projections onto PC2 of the overall gene expression data for males alone as the  
299 intermediate phenotype (n=36 unique individuals, n=70 samples). PC2 was strongly associated  
300 with male rank ( $\rho=0.44$ ,  $p=1.26 \times 10^{-4}$ ), and explained 6.7% of the overall variance in male gene  
301 expression levels. Gene Ontology categories that contributed strongly to PC2 (primarily gene  
302 sets involved in the innate/TLR4-mediated immune response) are shown in Figure 5 and Dataset

303 S6, based on mean loading across constituent genes for each category (excluding GO categories  
304 with < 10 genes; significance was assessed by comparison to an empirical null distribution  
305 calculated from permuting PC2 loadings across all genes). To identify potential instruments  
306 associated with PC2, we refiltered our initial genotype dataset (n = 99,760 SNPs) to only include  
307 variants with a MAF>5% in the dataset of male baboons, and, in cases where a SNP was in  
308 linkage disequilibrium with one or more nearby (<10 kb) candidate SNPs, we randomly retained  
309 one of the linked SNPs. This filtering left us with 39,461 SNPs. We then used a linear mixed  
310 effects model [20] to test for an association between SNP genotype and PC2 (controlling for  
311 genetic relatedness in the sample), and retained only those that passed a 5% FDR [10] (Figure 5)  
312 (n = 51 SNPs). To avoid redundancy among our instruments, we associated each of these 51  
313 SNPs with its closest gene and retained the SNP with the lowest p-value for each gene (n=47  
314 SNPs). Finally, we retained only SNPs close to genes that loaded highly on PC2 (i.e., that had  
315 loading scores in the highest or lowest decile). This filtering left us with 20 candidate SNP  
316 instruments.

317         Second, valid MR instruments must be related to the outcome variable only through an  
318 association with the intermediate phenotype, and not through any direct effect of the instrument  
319 on the outcome. In other words, in our analysis, genotype cannot be directly associated with  
320 dominance rank. To test for this requirement, we used linear models to estimate the relationship  
321 between SNP genotype for each of the 20 candidate SNP instruments and dominance rank,  
322 controlling for PC2. We removed SNPs that showed any evidence of a relationship with  
323 dominance rank after controlling for PC2 ( $p<0.05$ ), leaving us with 16 strong instruments (mean  
324 PVE for the correlation between a given SNP and PC2 ( $\pm$  SD) =  $27.28 \pm 6.64\%$ ). The

325 distribution of candidate instruments in gene bodies, coding sequences, exons, and 5' and 3'  
326 UTRs is shown in Figure S12.

327 Third, valid MR instruments should be unrelated to confounding factors that could bias  
328 the relationship between the intermediate phenotype and the outcome. This requirement is the  
329 most difficult to formally prove. However, we are unable to propose any plausible third variable  
330 that both predicts genotype at the 16 variants we analyzed *and* affects the relationship between  
331 gene expression and dominance rank. Genetic background/population structure is a candidate, as  
332 this population is affected by admixture between anubis and yellow baboons, and ancestry could  
333 potentially affect dominance rank. Body size is a second candidate, as larger size does predict  
334 rank, and it could conceivably influence immune cell gene expression captured by PC2.  
335 However, when we tested for associations between each of the 16 instruments and hybrid score  
336 (a measure of anubis baboon ancestry [35]) or body mass index at the time of sampling, we  
337 found no evidence for either relationship (linear model: all  $p > 0.05$  after FDR correction). We  
338 further tested for bias in our instruments as a result of population structure by including the  
339 following components in our linear mixed models to identify SNP-PC2 associations: (i) the top 5  
340 PCs from a principal components analysis of the genotype data, incorporated as fixed effects, or  
341 (ii) the covariance matrix derived from the genotype data (using the 'cov' function in R) as the  $K$   
342 matrix. In both cases, we saw minimal effects on the estimate of the SNP-PC2 relationship for  
343 our 16 instruments, suggesting that population structure does not impact our results (correlation  
344 between SNP-PC2 effect sizes estimated from the model in the main text versus a model that  
345 included PCs as fixed effects:  $p = 1.42 \times 10^{-12}$ ,  $r^2 = 0.973$ , or a model that substitutes the kinship  
346 matrix with the genetic covariance matrix:  $p = 1.16 \times 10^{-10}$ ,  $r^2 = 0.949$ ).

347 Finally, we note that because our MR analysis specifically tests whether genotype *effects*  
348 on immune gene expression (PC2) are positively correlated with genotype *effects* on dominance  
349 rank (for cases in which genotype does not independently predict rank), it does not require  
350 dominance rank to be a stable individual characteristic. Positive correlations indicate that males  
351 who are “genetically randomized” into lower values of PC2 are more likely to be higher ranking  
352 than otherwise expected. This interpretation allows MR analysis to be applied to dynamic  
353 phenotypes (e.g., HDL and LDL cholesterol levels [32,36]).

354

### 355 *Implementation of Mendelian randomization analysis*

356 Using the 16 instrumental variables (SNP genotypes) that passed our filters above and  
357 were robust to potential confounding variables, we compared effect sizes estimated from the  
358 following models: (i) a linear model testing for an effect of genotype on dominance rank and (ii)  
359 a linear mixed model testing for an effect of genotype on PC2. Intuitively, if gene expression is  
360 causal to dominance rank, individuals with genotypes that predispose them toward low PC2 gene  
361 expression values should tend to also be high rank (low PC2 values are associated with high  
362 social status; Figure 1). Consequently, the effect sizes from the two sets of linear models should  
363 be positively correlated. To test this prediction, we used the MR Egger method [37] implemented  
364 in the R package ‘MendelianRandomization’ [38]. MR Egger accounts for horizontal pleiotropy,  
365 in which a genetic variant affects the outcome via a biological pathway other than the  
366 intermediate phenotype. However, we obtain very similar results using more traditional  
367 approaches such as the weighted median (beta=1.26; p=4.04x10<sup>-16</sup>) and inverse-variance  
368 weighted methods (beta=1.513; p=8.53x10<sup>-5</sup>) [38]. Further, we obtain very similar results when  
369 rerunning the MR Egger analysis after iteratively removing each one of the 16 instruments,



370 suggesting that outlier instruments do not impact our conclusions ( $\beta > 0$  when 16/16  
371 instruments were iteratively removed and  $p < 0.05$  when 15/16 instruments were iteratively  
372 removed; for the last instrument,  $p = 0.105$ ). An overview of our MR pipeline is provided in  
373 Figure S10.

374 We also implemented MR analyses at the single gene level, where gene expression levels  
375 for the focal gene are the intermediate variable rather than the composite measure of gene  
376 expression captured by PC2. Specifically, for each gene that was significantly associated with  
377 male rank in our data set and for which we also detected a significant *cis*-eQTL ( $FDR < 5\%$ ), we  
378 tested for a relationship between effect sizes estimated from the following models: (i) a linear  
379 mixed model testing for an effect of *cis* genetic variation on gene expression and (ii) a linear  
380 model testing for an effect of genotype on dominance rank. To compare the two effect sizes, we  
381 used the ratio of coefficients method, also known as the Wald method, as described in [39]). In  
382 this analysis, our instruments are consequently eQTL, rather than QTL for a composite measure  
383 of rank-associated gene expression (i.e., PC2). We were interested in implementing this single  
384 gene approach both to understand the robustness of our conclusions to different methodologies,  
385 and also to compare against a “control” data set in which the study design precluded gene  
386 expression effects on dominance rank. Specifically, we implemented the same MR pipeline using  
387 genotype and gene expression data from female rhesus macaques [24], where dominance rank  
388 was experimentally manipulated and must therefore be causal to gene expression (we initially  
389 implemented the MR pipeline described in the main text for this data set, but found few strong  
390 instruments for PC2 of gene expression variation). As expected, we found no evidence for a  
391 relationship between the effect sizes estimated from models (i) and (ii) for the female macaques,  
392 where dominance rank was experimentally imposed, but we do observe a significant relationship

393 between the two effect sizes for many rank-associated genes in male baboons. An overview of  
394 the single gene pipeline, as well as results for both the baboon and macaque data sets, are  
395 presented in Figure S11.

396

397 **Figure S1. Ex vivo stimulation with lipopolysaccharide (LPS) induces changes in the**  
 398 **abundance of immune signaling molecules.** Comparison of levels of serum cytokines and  
 399 immune defense molecules in NULL and LPS samples, for all cytokines that met our filtering  
 400 criteria (see methods). P-values (uncorrected) represent the effect of treatment controlling for  
 401 age, sex, and batch effects in a linear model framework.  
 402

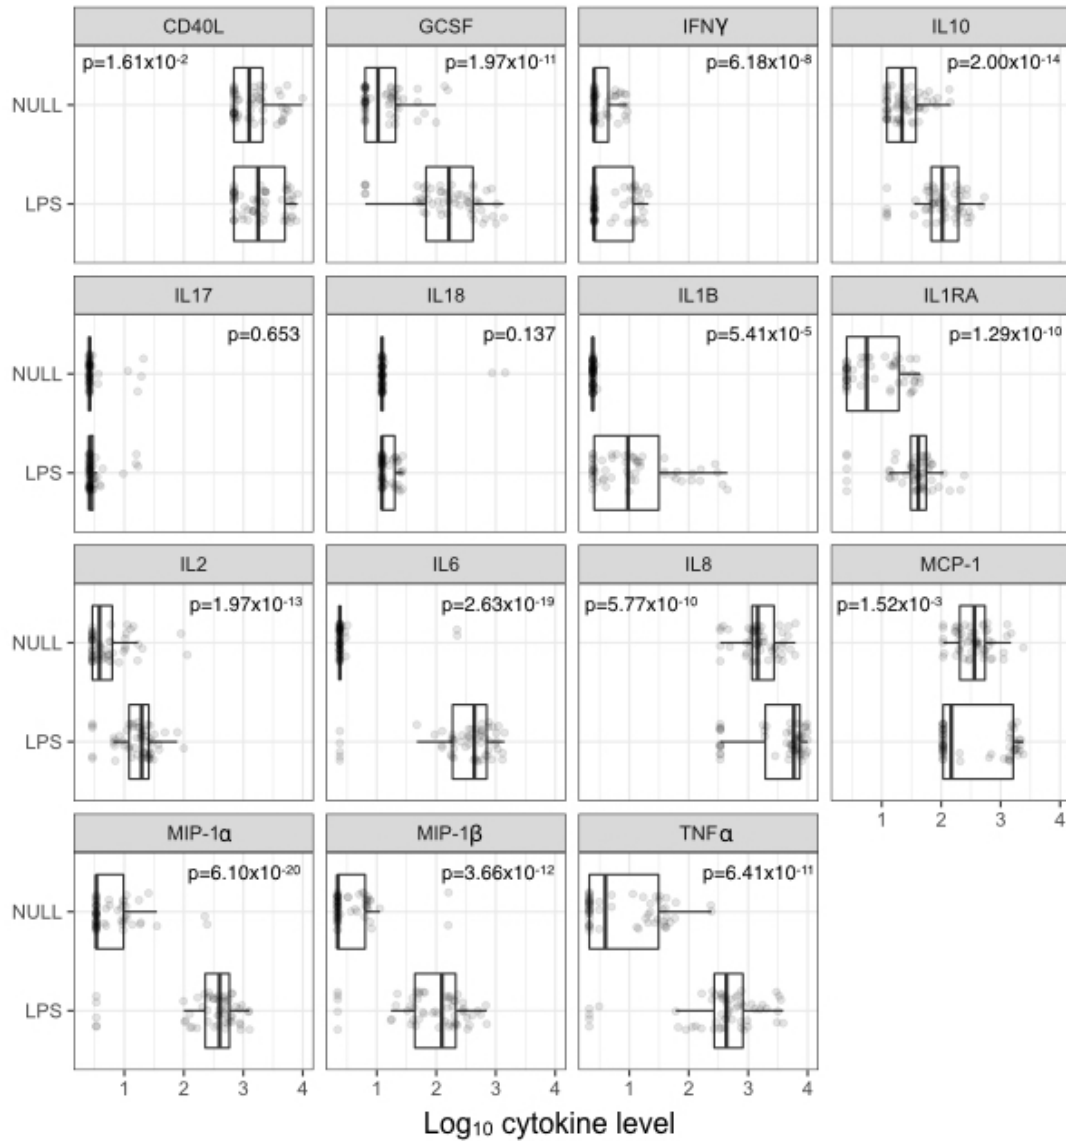

403

404 **Figure S2. Overview of cell phenotyping strategy.** Strategy for identifying populations of five  
405 different cell types within each PBMC sample. We gated on live cells and phenotyped these cell  
406 populations using the cell surface markers detailed in the SI Materials and Methods. All analyses  
407 were performed using FlowJo (FlowJo, LLC, Ashland, OR).

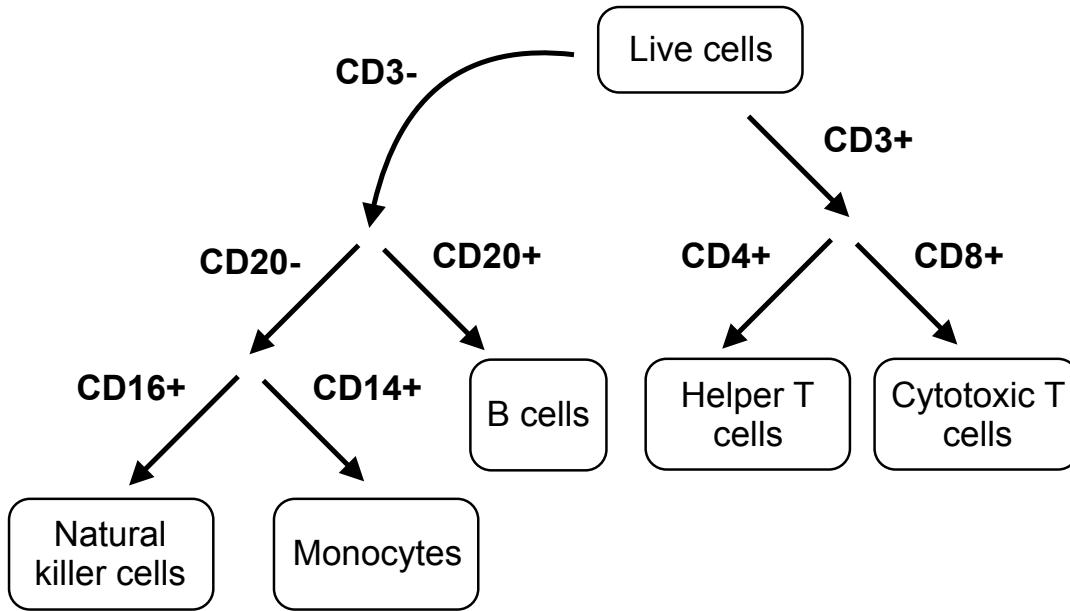

408  
409  
410  
411

412 **Figure S3. Association between dominance rank and the proportions of five white blood**  
 413 **cell populations.** Each plot shows the relationship between dominance rank (stratified by sex)  
 414 and the proportion of a given cell population. P-values represent the effect of dominance rank  
 415 (nested within sex) controlling for age (also nested within sex) in a linear model framework.

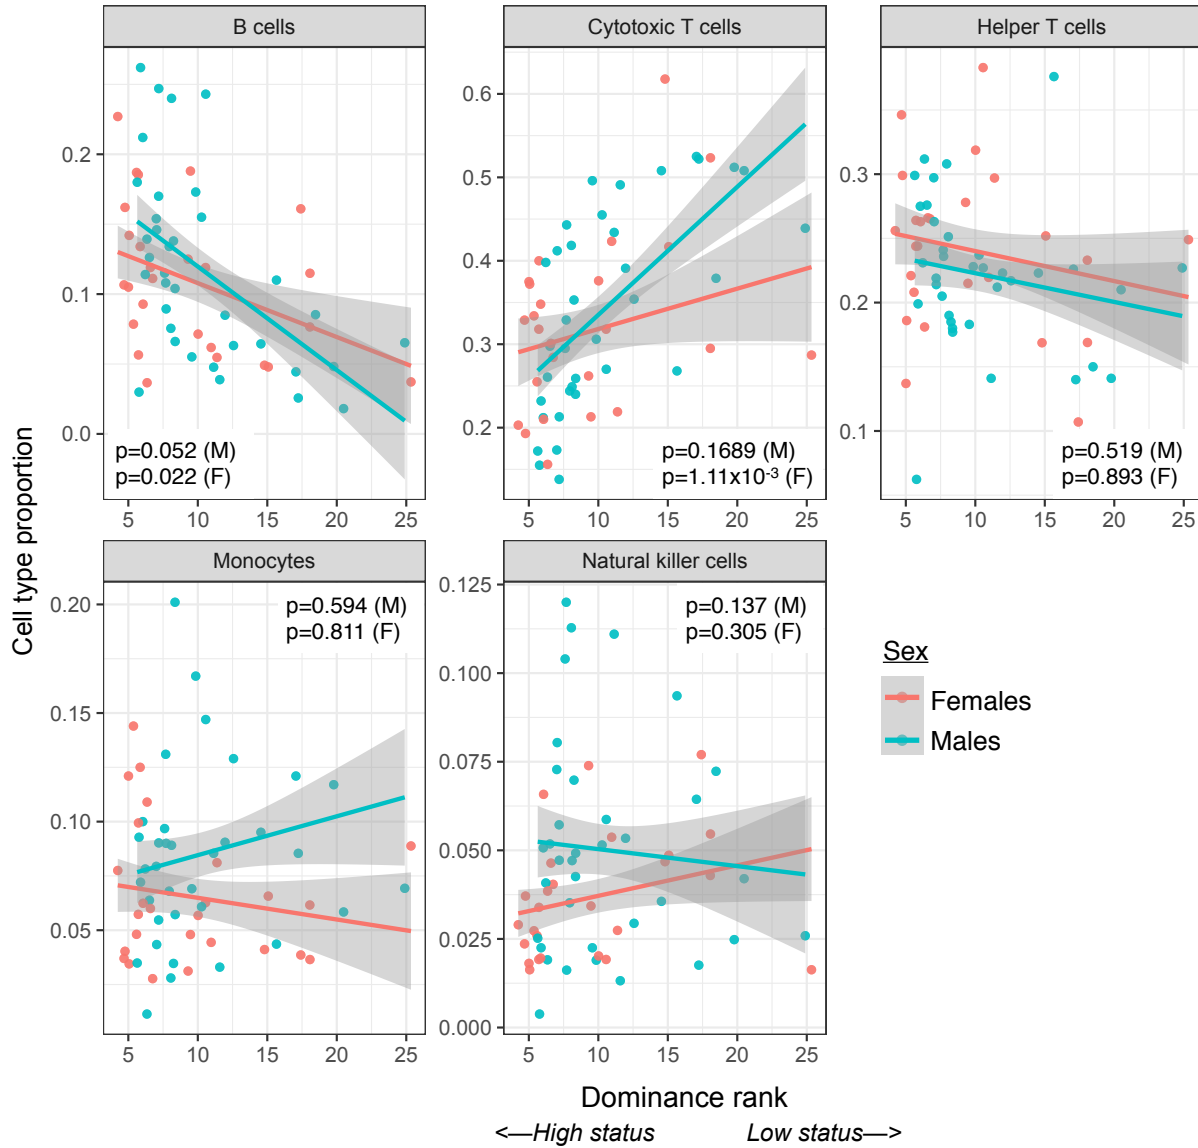

416  
 417  
 418

419 **Figure S4. Gene ontology (GO) term enrichment for genes that are significantly (A) up-**  
 420 **regulated or (B) down-regulated in the LPS condition in male and female baboons**  
 421 **(FDR<1%).** Each significant GO term is represented by a node, and related GO terms are  
 422 colored similarly and connected by edges.

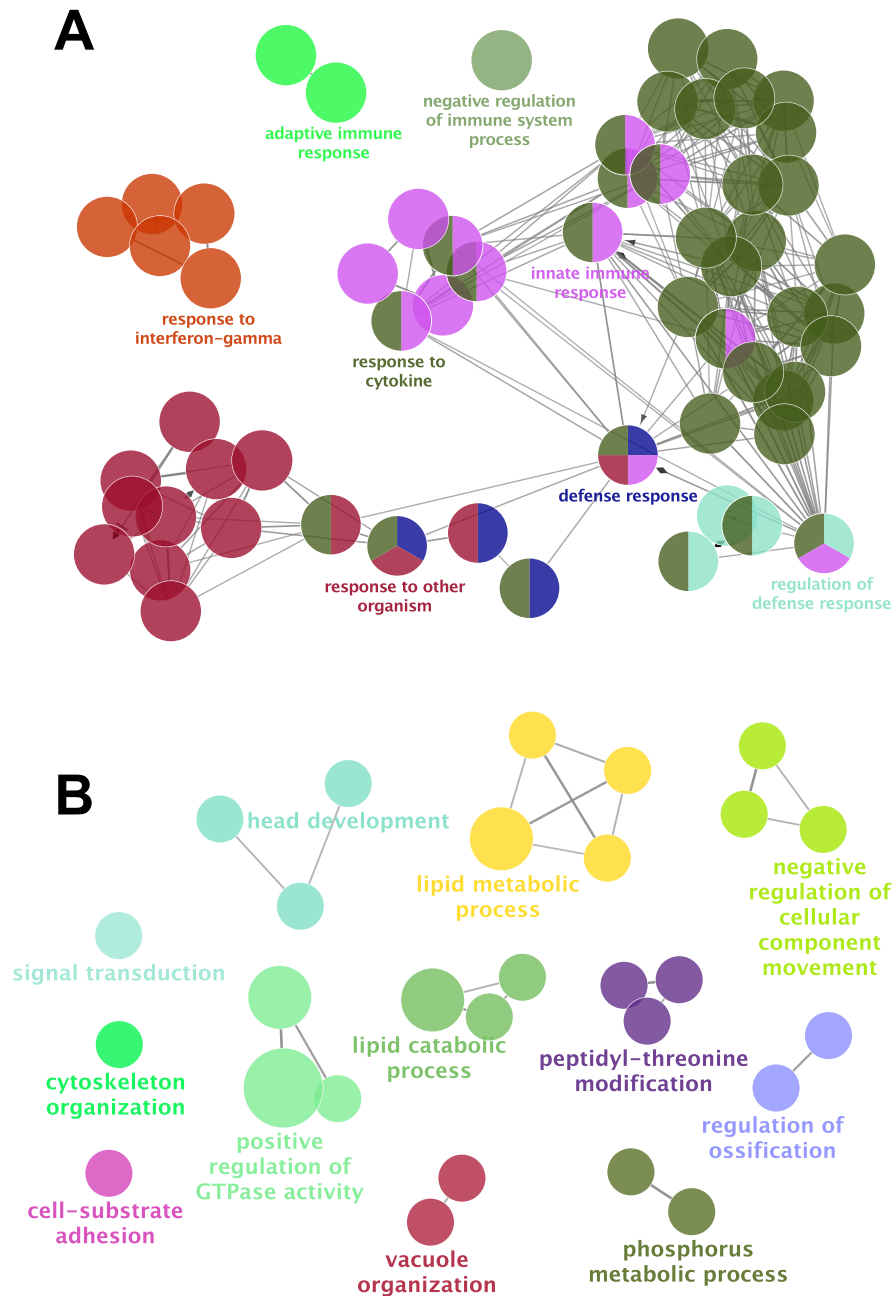

423  
 424  
 425  
 426

427 **Figure S5. Rank-gene expression relationships in males and females are largely distinct. (A)**  
 428 Comparison of effect sizes for rank effects estimated in males versus females. Points are colored  
 429 by whether the focal gene was significantly rank-associated in neither sex, one sex, or both sexes  
 430 (5% FDR). (B) QQ-plot comparing the distribution of p-values associated with the rank effect  
 431 estimated in females versus males. Comparison is against the expected null distribution (a  
 432 uniform distribution). In both A and B, p-values were derived from a linear mixed effects model  
 433 in which rank was nested within sex.

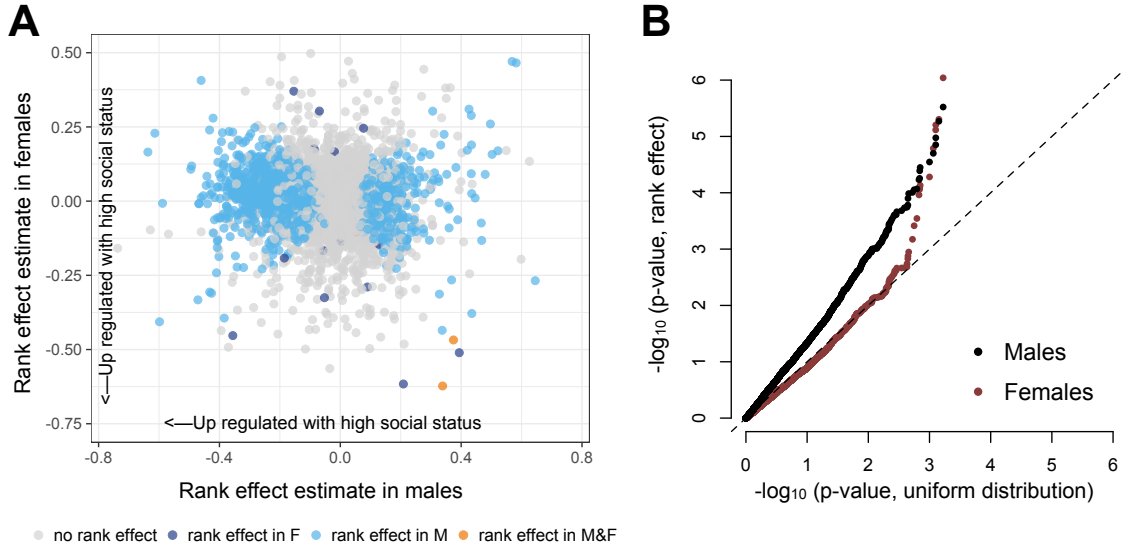

434  
 435  
 436

437 **Figure S6. Sample size does not completely explain the difference in the number of**  
 438 **significant rank-associated genes detected in males and females.** Distribution of the number  
 439 of rank-associated genes (FDR<5%) detected in (A) males and (B) females, as well as (C)  
 440 the difference in the number of rank-associated genes found in each sex (number of rank-associated  
 441 genes in males - number of rank-associated genes in females), after randomly subsampling our  
 442 dataset 100 times so that the number of samples derived from each sex were matched. Red lines  
 443 indicate values for the data set described in the main text. Across all subsamples, we consistently  
 444 found far more rank-associated genes in males than in females (an average of  $1387 \pm 819.09$  s.d.  
 445 more genes were associated with rank in males compared to females).  
 446

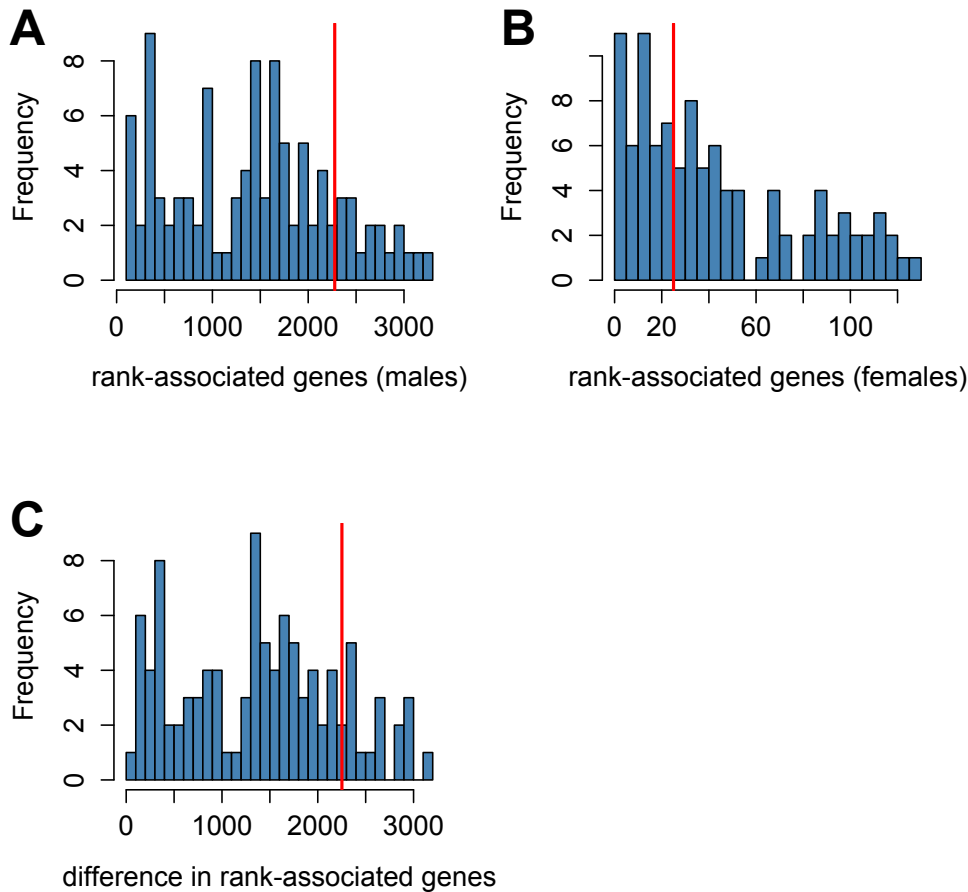

447  
 448



449 **Figure S7. Social status has weak effects on the strength of the response to LPS stimulation.**  
 450 (A) QQ-plot comparing the distribution of p-values for a rank x condition interaction effect  
 451 estimated from a linear mixed effects model (for males and females separately; all models  
 452 controlled for age, dominance rank, and condition as fixed effects) against the expected uniform  
 453 distribution. 5 and 0 genes exhibit a significant (FDR<5%) rank x condition interaction in males  
 454 and females, respectively, although the QQ-plot for males suggests that detection of interaction  
 455 effects is constrained by power. (B) Magnitude of the rank effect estimated in males in the LPS  
 456 and NULL conditions ( $\rho=0.619$ ,  $p<10^{-10}$ ). Effect sizes are derived from a linear mixed effects  
 457 model using male data only, in which rank effects were nested within condition. Genes with no  
 458 rank effects in either condition (FDR>20% in both LPS and NULL conditions), rank effects in  
 459 the LPS or NULL condition only (FDR>20% in one condition and <5% in the other), or rank  
 460 effects in both conditions (FDR<5% in both conditions) are highlighted as described in the  
 461 legend.  
 462

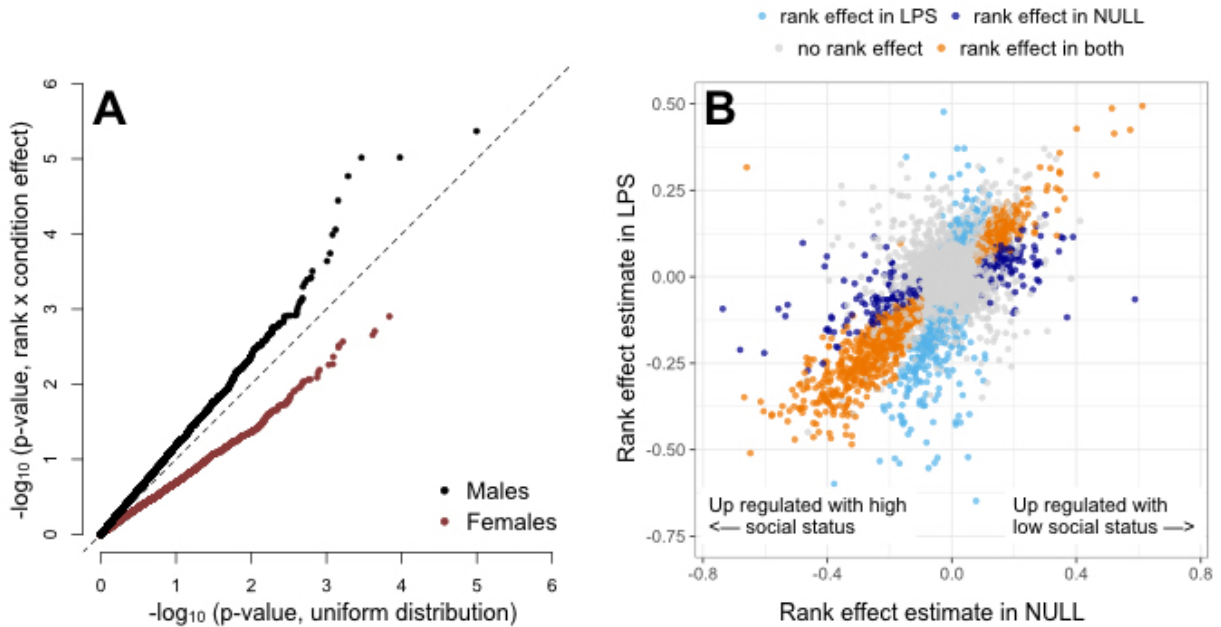

463  
 464

465 **Figure S8. High status males exhibit higher expression of pro-inflammatory genes**  
466 **compared to low status males, in both NULL and LPS condition samples.** Each point  
467 represents the median expression level for a given sample, across all genes included in the  
468 following GO annotations: 'regulation of IL6 production', 'toll-like receptor signaling pathway',  
469 and 'regulation of inflammatory response' (all three categories are enriched among genes  
470 significantly upregulated in high status males,  $p < 10^{-6}$ ). Lines connect samples collected from  
471 the same male, and are colored by quartiles of dominance rank.

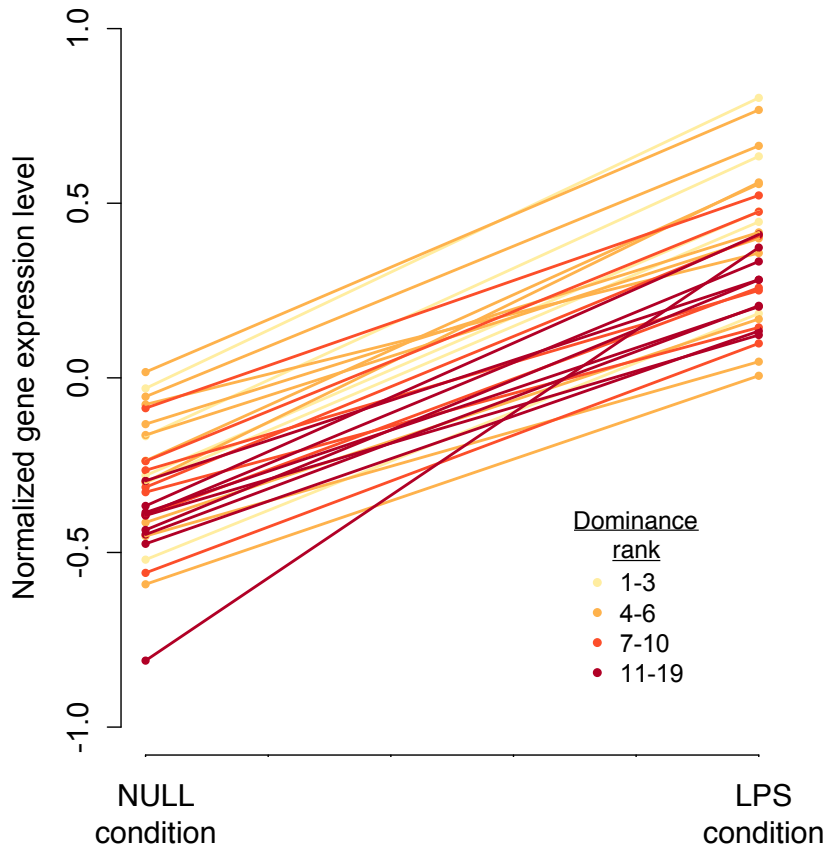

472  
473

474 **Figure S9. Genes up-regulated in low-ranking captive female macaques are up-regulated in**  
475 **high-ranking wild male baboons.** X-axis: effect of rank on gene expression reported in [24], for  
476 leukocytes incubated in the presence (A; LPS condition, as shown in Figure 3B and repeated  
477 here for comparison to the NULL) or absence (B: NULL condition) of lipopolysaccharide. Effect  
478 sizes were estimated from linear mixed effects models, in which dominance rank was nested  
479 within condition. Y-axis: parallel results from wild male baboons. Effect sizes and p-values are  
480 from Spearman's rank correlations, and sign-reversed for the macaque data set for easier  
481 comparison to baboons.

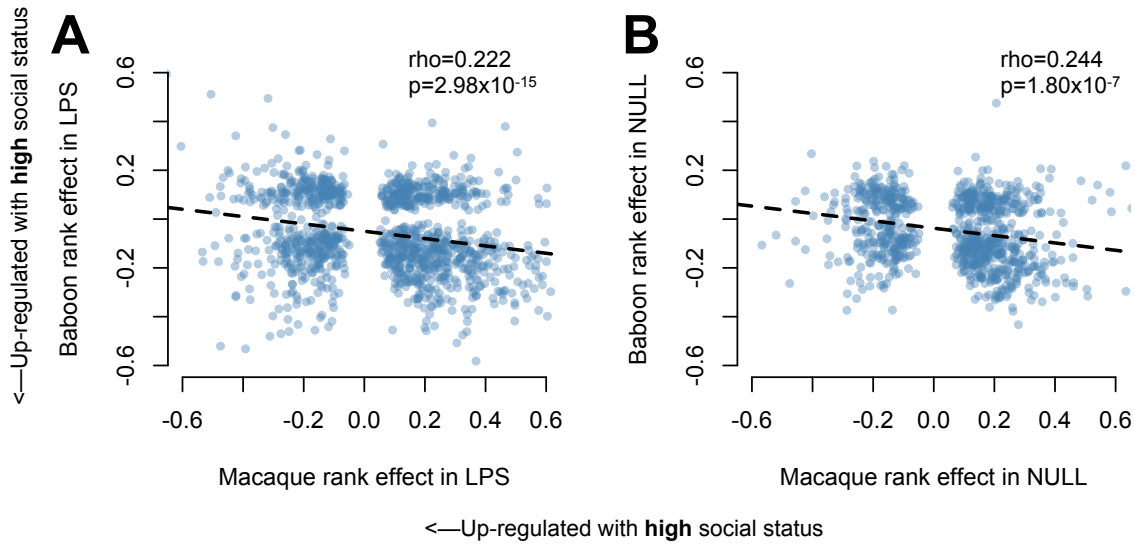

482  
483

484 **Figure S10. Overview of filtering procedures for Mendelian randomization analyses.**

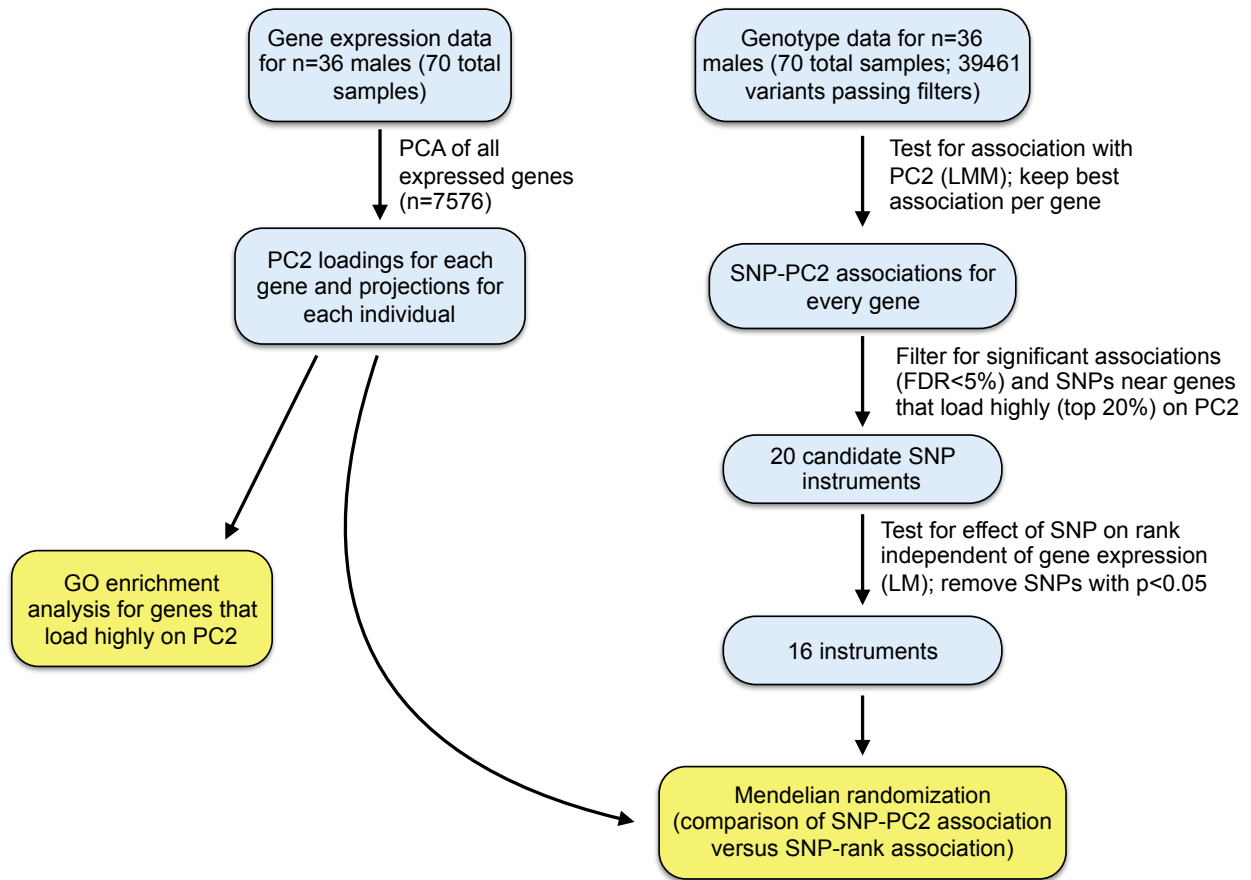

485  
486  
487  
488

489 **Figure S11. Overview of methods and results for single gene Mendelian randomization**  
 490 **analyses.** (A) Methodological approach and filtering procedures. The same approach was  
 491 applied to both the female rhesus macaque and male baboon data sets. Distribution of p-values  
 492 from a Wald test performed using each of the instruments passing filters in the (B) macaque and  
 493 (C) baboon data set.

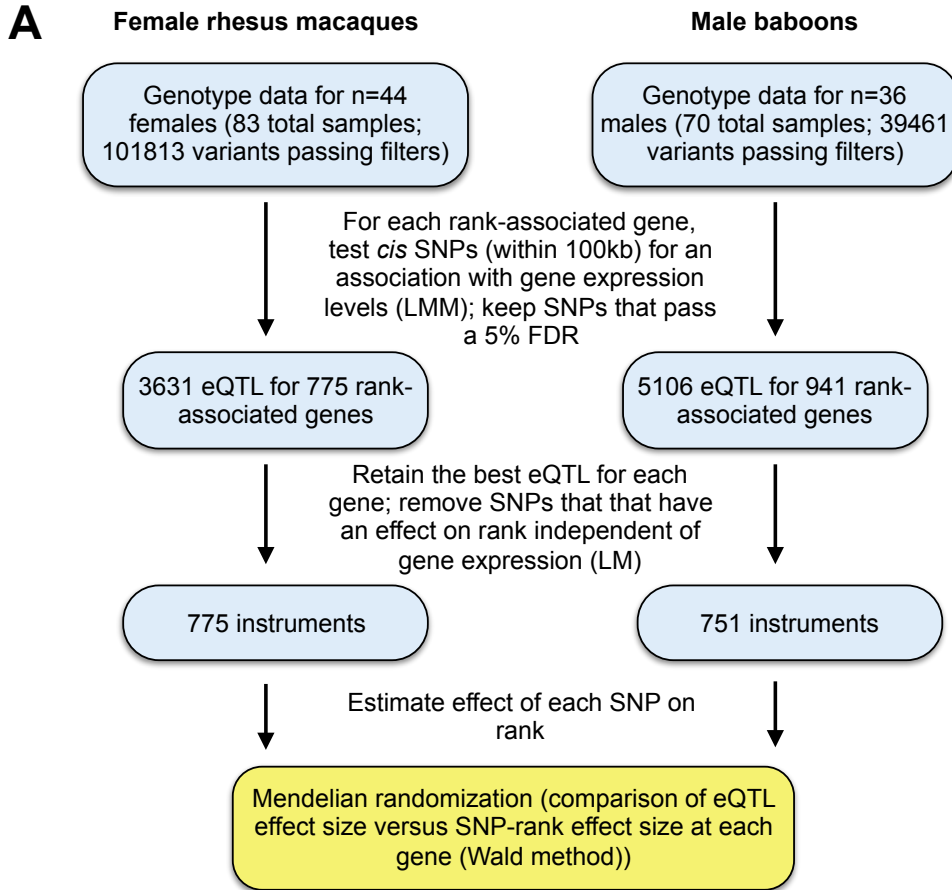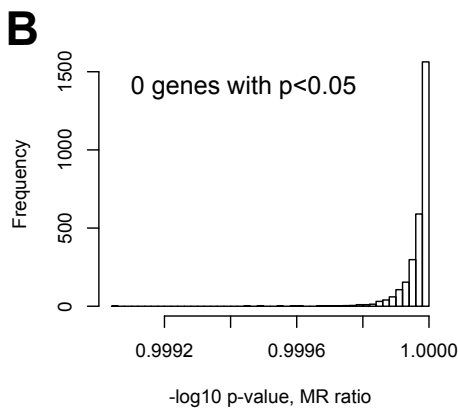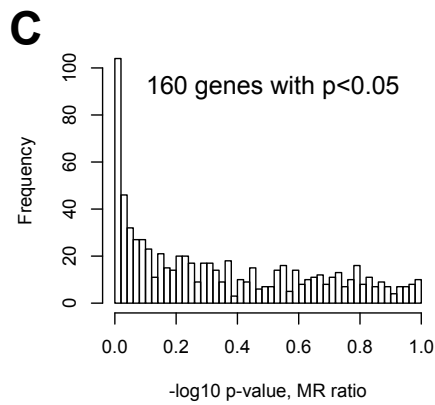

494  
495

496 **Figure S12. MR instruments are more likely to occur in genes and regulatory**  
497 **regions.** Barplots show the proportion of SNPs falling into each annotation category, for the 16  
498 MR instruments and for all 39,461 SNPs that were considered as candidate instruments.  
499 Annotations were taken from the Panu2 GTF file (version 0.90), downloaded from Ensembl.  
500 'CDS' refers to the coding portion of a given gene, and 'gene' is defined as all sequence between  
501 the 5' and 3' UTR (and therefore includes all categories except 'none'). SNPs that did not overlap  
502 with any annotated regions from the GTF file were assigned to the annotation category 'none'.

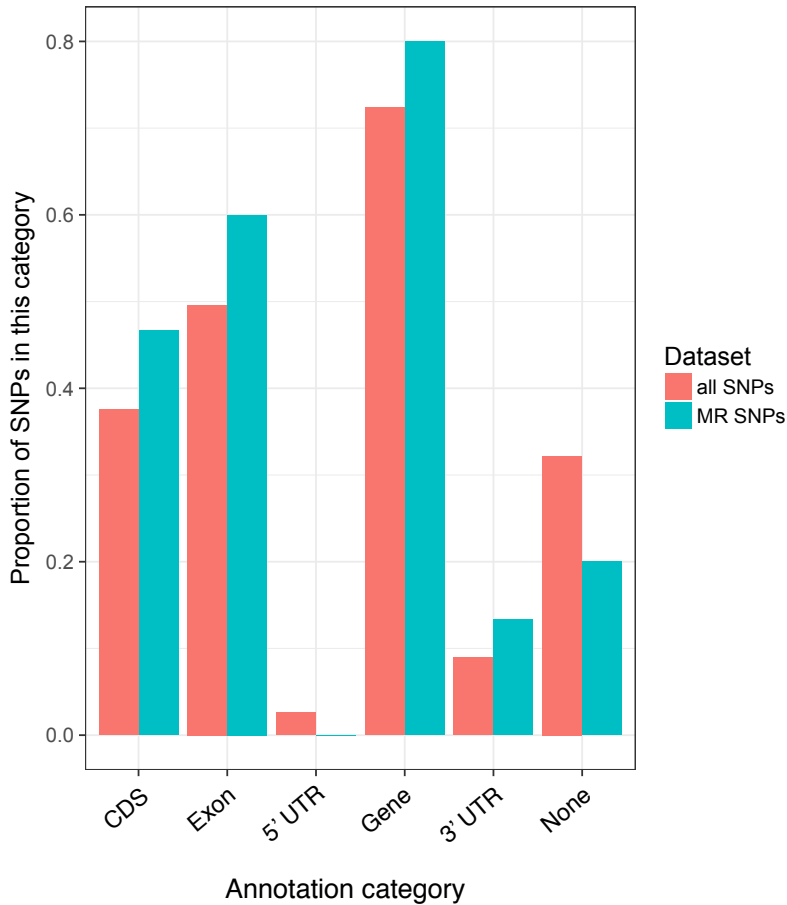

503  
504

505 **Supplementary References**

506

- 507 1. Wall JD, Schlebusch SA, Alberts SC, Cox LA, Snyder-Mackler N, Nevoenon KA, et al.  
508 Genomewide ancestry and divergence patterns from low-coverage sequencing data reveal  
509 a complex history of admixture in wild baboons. *Mol Ecol.* 2016;25: 3469–3483.  
510 doi:10.1111/mec.13684
- 511 2. Alberts SC, Altmann J. The Amboseli Baboon Research Project: 40 years of continuity  
512 and change. In: Kappeler P, Watts DP, editors. *Long-Term Field Studies of Primates.* New  
513 York: Springer; 2012. pp. 261–288.
- 514 3. Altmann J, Altmann S, Hausfater G. Physical maturation and age estimates of yellow  
515 baboons, *Papio cynocephalus*, in Amboseli National Park, Kenya. *Am J Primatol.* 1981;1:  
516 389–399. doi:10.1002/ajp.1350010404
- 517 4. Hausfater G. Dominance and reproduction in baboons (*Papio cynocephalus*): A  
518 quantitative analysis. University of Chicago. 1974.
- 519 5. Tung J, Zhou X, Alberts SC, Stephens M, Gilad Y. The genetic architecture of gene  
520 expression levels in wild baboons. *eLife.* 2015;4: 1–22. doi:10.7554/eLife.04729
- 521 6. Tung J, Primus A, Bouley AJ, Severson TF, Alberts SC, Wray G. Evolution of a malaria  
522 resistance gene in wild primates. *Nature.* 2009;460: 388–91. doi:10.1038/nature08149
- 523 7. Tung J, Akinyi MY, Mutura S, Altmann J, Wray G, Alberts SC. Allele-specific gene  
524 expression in a wild nonhuman primate population. *Mol Ecol.* 2011;20: 725–39.  
525 doi:10.1111/j.1365-294X.2010.04970.x
- 526 8. Altmann J, Alberts S, Haines S, Dubach J, Muruthi PM, Coote T, et al. Behavior predicts  
527 genetic structure in a wild primate group. *Proc Natl Acad Sci.* 1996;93: 5797–5801.
- 528 9. Pinheiro J, Bates D, DebRoy S, Sarka D. *nlme: Linear and Nonlinear Mixed Effects*

529 Models. R Packag version 31-131. 2017;

530 10. Dabney A, Storey J. qvalue: Q-value estimation for false discovery rate control. R  
531 package version 1.43.0. 2015.

532 11. Storey JD, Tibshirani R. Statistical significance for genomewide studies. *Proc Natl Acad*  
533 *Sci.* 2003;100: 9440–5. doi:10.1073/pnas.1530509100

534 12. Bolger AM, Lohse M, Usadel B. Trimmomatic: A flexible trimmer for Illumina sequence  
535 data. *Bioinformatics.* 2014;30: 2114–2120. doi:10.1093/bioinformatics/btu170

536 13. Dobin A, Davis CA, Schlesinger F, Drenkow J, Zaleski C, Jha S, et al. STAR: ultrafast  
537 universal RNA-seq aligner. *Bioinformatics.* 2013; 1–7. doi:doi:  
538 10.1093/bioinformatics/bts635

539 14. Anders S. HTSeq: Analysing high-throughput sequencing data with Python [Internet].  
540 2011. Available: <http://www-huber.embl.de/users/anders/HTSeq/>

541 15. O’Leary NA, Wright MW, Brister JR, Ciufo S, Haddad D, McVeigh R, et al. Reference  
542 sequence (RefSeq) database at NCBI: Current status, taxonomic expansion, and functional  
543 annotation. *Nucleic Acids Res.* 2016;44: D733–D745. doi:10.1093/nar/gkv1189

544 16. Law C, Chen Y, Shi W, Smyth G. Voom! Precision weights unlock linear model analysis  
545 tools for RNA-seq read counts. *Genome Biol. Melbourne, Australia;* 2014;15: R29.

546 17. Danecek P, Auton A, Abecasis G, Albers C a, Banks E, DePristo M a, et al. The variant  
547 call format and VCF tools. *Bioinformatics.* 2011;27: 2156–8.  
548 doi:10.1093/bioinformatics/btr330

549 18. Browning BL, Browning SR. A unified approach to genotype imputation and haplotype-  
550 phase inference for large data sets of trios and unrelated individuals. *Am J Hum Genet.*  
551 *The American Society of Human Genetics;* 2008;84: 210–223.



- 552 doi:10.1016/j.ajhg.2009.01.005
- 553 19. Manichaikul A, Mychaleckyj JC, Rich SS, Daly K, Sale M, Chen WM. Robust  
554 relationship inference in genome-wide association studies. *Bioinformatics*. 2010;26:  
555 2867–2873. doi:10.1093/bioinformatics/btq559
- 556 20. Akdemir D, Godfrey OU. EMMREML: Fitting mixed models with known covariance  
557 structures. 2015.
- 558 21. Wright FA, Sullivan PF, Brooks AI, Zou F, Sun W, Xia K, et al. Heritability and  
559 genomics of gene expression in peripheral blood. *Nat Genet*. Nature Publishing Group;  
560 2014;46: 430–437. doi:10.1038/ng.2951
- 561 22. Yu J, Pressoir G, Briggs WH, Vroh Bi I, Yamasaki M, Doebley JF, et al. A unified mixed-  
562 model method for association mapping that accounts for multiple levels of relatedness.  
563 *Nat Genet*. 2006;38: 203–8. doi:10.1038/ng1702
- 564 23. Zhou X, Stephens M. Genome-wide efficient mixed-model analysis for association  
565 studies. *Nat Genet*. 2012;44: 821–4. doi:10.1038/ng.2310
- 566 24. Snyder-Mackler N, Sanz J, Kohn JN, Brinkworth JF, Morrow S, Shaver AO, et al. Social  
567 status alters immune regulation and response to infection. *Science*. 2016;354: 1041–1045.  
568 doi:10.1126/science.aah3580
- 569 25. Bindea G, Mlecnik B, Hackl H, Charoentong P, Tosolini M, Kirilovsky A, et al. ClueGO:  
570 A Cytoscape plug-in to decipher functionally grouped gene ontology and pathway  
571 annotation networks. *Bioinformatics*. 2009;25: 1091–1093.  
572 doi:10.1093/bioinformatics/btp101
- 573 26. Benjamini Y, Hochberg Y. Controlling the false discovery rate: a practical and powerful  
574 approach to multiple testing. *J R Stat Soc*. 1995;57: 289–300.

- 575 27. Ramsey SA, Klemm SL, Zak DE, Kennedy KA, Thorsson V, Li B, et al. Uncovering a  
576 macrophage transcriptional program by integrating evidence from motif scanning and  
577 expression dynamics. *PLoS Comput Biol.* 2008;4. doi:10.1371/journal.pcbi.1000021
- 578 28. Altmann J. *Observational Study of Behavior: Sampling Methods.* Behaviour. 1974;49:  
579 227–267.
- 580 29. Archie EA, Tung J, Clark M, Altmann J, Alberts SC. Social affiliation matters: both same-  
581 sex and opposite-sex relationships predict survival in wild female baboons. *Proc R Soc*  
582 *London B Biol Sci.* 2014;281: 20141261. doi:10.1098/rspb.2014.1261
- 583 30. Smith GD, Ebrahim S. “Mendelian randomization”: Can genetic epidemiology contribute  
584 to understanding environmental determinants of disease? *Int J Epidemiol.* 2003;32: 1–22.  
585 doi:10.1093/ije/dyg070
- 586 31. Smith GD, Hemani G. Mendelian randomization: Genetic anchors for causal inference in  
587 epidemiological studies. *Hum Mol Genet.* 2014;23: 89–98. doi:10.1093/hmg/ddu328
- 588 32. Voight BF, Peloso GM, Orho-Melander M, Frikke-Schmidt R, Barbalic M, Jensen MK, et  
589 al. Plasma HDL cholesterol and risk of myocardial infarction: A mendelian randomisation  
590 study. *Lancet.* 2012;380: 572–580. doi:10.1016/S0140-6736(12)60312-2
- 591 33. Richmond RC, Hemani G, Tilling K, Davey Smith G, Relton CL. Challenges and novel  
592 approaches for investigating molecular mediation. *Hum Mol Genet.* 2016;25: R149–R156.  
593 doi:10.1093/hmg/ddw197
- 594 34. Richardson TG, Zheng J, Davey Smith G, Timpson NJ, Gaunt TR, Relton CL, et al.  
595 Mendelian Randomization Analysis Identifies CpG Sites as Putative Mediators for  
596 Genetic Influences on Cardiovascular Disease Risk. *Am J Hum Genet.* ElsevierCompany.;  
597 2017;101: 590–602. doi:10.1016/j.ajhg.2017.09.003

- 598 35. Tung J, Charpentier MJE, Garfield D a, Altmann J, Alberts SC. Genetic evidence reveals  
599 temporal change in hybridization patterns in a wild baboon population. *Mol Ecol*.  
600 2008;17: 1998–2011. doi:10.1111/j.1365-294X.2008.03723.x
- 601 36. Burgess S, Harshfield E. Mendelian randomization to assess causal effects of blood lipids  
602 on coronary heart disease: Lessons from the past and applications to the future. *Curr Opin*  
603 *Endocrinol Diabetes Obes*. 2016;23: 124–130. doi:10.1097/MED.0000000000000230
- 604 37. Bowden J, Smith GD, Burgess S. Mendelian randomization with invalid instruments:  
605 Effect estimation and bias detection through Egger regression. *Int J Epidemiol*. 2015;44:  
606 512–525. doi:10.1093/ije/dyv080
- 607 38. Yavorska OO, Burgess S. MendelianRandomization: An R package for performing  
608 Mendelian randomization analyses using summarized data. *Int J Epidemiol*. 2017;46:  
609 1734–1739. doi:10.1093/ije/dyx034
- 610 39. Burgess S, Small DS, Thompson SG. A review of instrumental variable estimators for  
611 Mendelian randomization. *Stat Methods Med Res*. 2017;26: 2333–2355.  
612 doi:10.1177/0962280215597579
- 613
